# Supplementary material
Source: PubMed Central journal article supplement (PMC2633598)
Supplement: NIHMS82449-supplement-Du_et_al_Supp.pdf [file NIHMS82449-supplement-Du_et_al_Supp.pdf]

## Supplementary online materials

### Supplementary Table 1

The effects of GdnHCl treatment and *HSP104* disruption on [*SWI*<sup>+</sup>]

| treatment                                              | number of colonies |                  |     |
|--------------------------------------------------------|--------------------|------------------|-----|
|                                                        | Ade <sup>+</sup>   | Raf <sup>+</sup> | YPD |
| <b>5 mM GdnHCl:</b>                                    |                    |                  |     |
| [ <i>PSI</i> <sup>+</sup> ][ <i>SWI</i> <sup>+</sup> ] | 0                  | 22               | 22  |
| [ <i>PSI</i> <sup>+</sup> ][ <i>swi</i> <sup>-</sup> ] | 0                  | 15               | 15  |
| [ <i>psi</i> <sup>-</sup> ][ <i>SWI</i> <sup>+</sup> ] | 0                  | 88               | 88  |
| [ <i>psi</i> <sup>-</sup> ][ <i>swi</i> <sup>-</sup> ] | 0                  | 13               | 13  |
| <b><i>hsp104</i> Δ:</b>                                |                    |                  |     |
| [ <i>PSI</i> <sup>+</sup> ][ <i>SWI</i> <sup>+</sup> ] | 0                  | 47               | 47  |
| [ <i>PSI</i> <sup>+</sup> ][ <i>swi</i> <sup>-</sup> ] | 0                  | 18               | 18  |
| [ <i>psi</i> <sup>-</sup> ][ <i>SWI</i> <sup>+</sup> ] | 0                  | 59               | 59  |
| [ <i>psi</i> <sup>-</sup> ][ <i>swi</i> <sup>-</sup> ] | 0                  | 11               | 11  |
| <b>non-GdnHCl (wt):</b>                                |                    |                  |     |
| [ <i>PSI</i> <sup>+</sup> ][ <i>SWI</i> <sup>+</sup> ] | 48                 | 0                | 48  |
| [ <i>PSI</i> <sup>+</sup> ][ <i>swi</i> <sup>-</sup> ] | 33                 | 33               | 33  |
| [ <i>psi</i> <sup>-</sup> ][ <i>SWI</i> <sup>+</sup> ] | 0                  | 0                | 125 |
| [ <i>psi</i> <sup>-</sup> ][ <i>swi</i> <sup>-</sup> ] | 0                  | 24               | 24  |

Individual colonies of [*PSI*<sup>+</sup>][*SWI*<sup>+</sup>], [*PSI*<sup>+</sup>][*swi*<sup>-</sup>], [*psi*<sup>-</sup>][*SWI*<sup>+</sup>], and [*psi*<sup>-</sup>][*swi*<sup>-</sup>] that had been treated with or without 5 mM GdnHCl or undergone *HSP104* disruption were streaked on SC-adenine, SC +raffinose +antimycin, and YPD plates in parallel. After 3 days incubation at 30°C, their ability to grow on the indicated media were examined. Ade<sup>+</sup> and Raf<sup>+</sup> indicate [*PSI*<sup>+</sup>] and [*swi*<sup>-</sup>], respectively.

**Supplementary Table 2**  
**The effect of *HSP104* overexpression on [SWI<sup>+</sup>] - (a)**

|                                                            |                              | <u>number of colonies</u> |                  |      | <u>percentage(%)</u> |                  |
|------------------------------------------------------------|------------------------------|---------------------------|------------------|------|----------------------|------------------|
|                                                            |                              | Ade <sup>+</sup>          | Raf <sup>+</sup> | YPD  | Ade <sup>+</sup>     | Raf <sup>+</sup> |
| <b>[PSI<sup>+</sup>][SWI<sup>+</sup>], <i>HSP104</i> ↑</b> | colony 1                     | 94                        | 47               | 264  | 35.6                 | 17.8             |
|                                                            | colony 2                     | 87                        | 37               | 251  | 34.7                 | 14.7             |
|                                                            | colony 3                     | 139                       | 29               | 305  | 45.6                 | 9.5              |
|                                                            | colony 4                     | 132                       | 36               | 318  | 41.5                 | 11.3             |
|                                                            | <b>Average of colony 1-4</b> |                           |                  |      | 39.3±5.1             | 13.3±3.7         |
| <b>[PSI<sup>+</sup>][SWI<sup>+</sup>], vector</b>          | colony 1                     | 741                       | 0                | 737  | 100.5                | 0.0              |
|                                                            | colony 2                     | 746                       | 0                | 751  | 99.3                 | 0.0              |
|                                                            | colony 3                     | 669                       | 0                | 692  | 96.7                 | 0.0              |
|                                                            | <b>Average of colony 1-3</b> |                           |                  |      | 98.9±2.0             | 0.0±0.0          |
| <b>[PSI<sup>+</sup>][swi<sup>-</sup>], <i>HSP104</i> ↑</b> | colony 1                     | 184                       | 619              | 621  | 29.6                 | 99.7             |
|                                                            | colony 2                     | 151                       | 477              | 474  | 31.9                 | 100.6            |
|                                                            | colony 3                     | 342                       | 807              | 804  | 42.5                 | 100.4            |
|                                                            | <b>Average of colony 1-3</b> |                           |                  |      | 34.7±6.9             | 100.2±0.5        |
| <b>[PSI<sup>+</sup>][swi<sup>-</sup>], vector</b>          | colony 1                     | 644                       | 656              | 659  | 97.7                 | 99.5             |
|                                                            | colony 2                     | 130                       | 131              | 128  | 101.6                | 102.3            |
|                                                            | colony 3                     | 1109                      | 1116             | 1120 | 99.0                 | 99.6             |
|                                                            | <b>Average of colony 1-3</b> |                           |                  |      | 99.4±2.0             | 100.5±1.6        |
| <b>[psi<sup>-</sup>][SWI<sup>+</sup>], <i>HSP104</i> ↑</b> | colony 1                     | 0                         | 0                | 556  | 0.0                  | 0.0              |
|                                                            | colony 2                     | 0                         | 0                | 436  | 0.0                  | 0.0              |
|                                                            | colony 3                     | 0                         | 1                | 1152 | 0.0                  | 0.1              |
|                                                            | colony 4                     | 0                         | 0                | 316  | 0.0                  | 0.0              |
|                                                            | colony 5                     | 0                         | 0                | 456  | 0.0                  | 0.0              |
|                                                            | <b>Average of colony 1-5</b> |                           |                  |      | 0.0±0.0              | 0.0±0.0          |
| <b>[psi<sup>-</sup>][SWI<sup>+</sup>], vector</b>          | colony 1                     | 0                         | 1                | 2340 | 0.0                  | 0.0              |
|                                                            | colony 2                     | 0                         | 0                | 780  | 0.0                  | 0.0              |
|                                                            | <b>Average of colony 1-2</b> |                           |                  |      | 0.0±0.0              | 0.0±0.0          |
| <b>[psi<sup>-</sup>][swi<sup>-</sup>], <i>HSP104</i> ↑</b> | colony 1                     | 0                         | 459              | 464  | 0.0                  | 98.9             |
|                                                            | colony 2                     | 0                         | 531              | 528  | 0.0                  | 100.6            |
|                                                            | colony 3                     | 0                         | 357              | 368  | 0.0                  | 97.0             |
|                                                            | <b>Average of colony 1-3</b> |                           |                  |      | 0.0±0.0              | 98.8±1.8         |
| <b>[psi<sup>-</sup>][swi<sup>-</sup>], vector</b>          | colony 1                     | 0                         | 776              | 788  | 0.0                  | 98.5             |
|                                                            | colony 2                     | 0                         | 334              | 338  | 0.0                  | 98.8             |
|                                                            | colony 3                     | 0                         | 554              | 548  | 0.0                  | 101.1            |
|                                                            | <b>Average of colony 1-3</b> |                           |                  |      | 0.0±0.0              | 99.5±1.4         |

(a) Fresh transformants carrying the *HSP104*-expression plasmid, *p2HG-HSP104*, or empty vector, *p2HG*, were resuspended in SC-histidine medium. Equal numbers of cells were spread on SC-adenine, SC+raffinose+antimycin, and YPD plates. After 3 days incubation, the number of colonies on SC-ade, raffinose, and YPD were counted. Ade<sup>+</sup> and Raf<sup>+</sup> indicate [PSI<sup>+</sup>] and [swi<sup>-</sup>], respectively.

The effect of *HSP104* overexpression on [SWI<sup>+</sup>] - (b)

|                                                            | <u>colony number</u>         |                  |     | <u>percentage(%)</u> |                  |          |
|------------------------------------------------------------|------------------------------|------------------|-----|----------------------|------------------|----------|
|                                                            | Ade <sup>+</sup>             | Raf <sup>+</sup> | YPD | Ade <sup>+</sup>     | Raf <sup>+</sup> |          |
| <b>[PSI<sup>+</sup>][SWI<sup>+</sup>], <i>HSP104</i> ↑</b> | colony 1                     | 4                | 73  | 227                  | 1.8              | 32.2     |
|                                                            | colony 2                     | 6                | 62  | 297                  | 2.0              | 20.9     |
|                                                            | colony 4                     | 20               | 61  | 493                  | 4.1              | 12.4     |
|                                                            | colony 5                     | 8                | 93  | 475                  | 1.7              | 19.6     |
|                                                            | <b>Average of colony 1-4</b> |                  |     |                      | 2.4±1.1          | 21.2±8.2 |
| <b>[PSI<sup>+</sup>][SWI<sup>+</sup>], vector</b>          | colony 1                     | 461              | 0   | 457                  | 100.9            | 0.0      |
|                                                            | colony 2                     | 552              | 0   | 560                  | 98.6             | 0.0      |
|                                                            | colony 3                     | 476              | 0   | 492                  | 96.7             | 0.0      |
|                                                            | <b>Average of colony 1-4</b> |                  |     |                      | 98.7±2.1         | 0.0±0.0  |
| <b>[psi<sup>-</sup>][SWI<sup>+</sup>], <i>HSP104</i> ↑</b> | colony 1                     | 0                | 0   | 456                  | 0.0              | 0.0      |
|                                                            | colony 2                     | 0                | 0   | 340                  | 0.0              | 0.0      |
|                                                            | colony 3                     | 0                | 0   | 241                  | 0.0              | 0.0      |
|                                                            | colony 4                     | 0                | 0   | 117                  | 0.0              | 0.0      |
|                                                            | colony 5                     | 0                | 0   | 231                  | 0.0              | 0.0      |
|                                                            | <b>Average of colony 1-5</b> |                  |     |                      | 0.0±0.0          | 0.0±0.0  |
| <b>[psi<sup>-</sup>][SWI<sup>+</sup>], vector</b>          | colony 1                     | 0                | 0   | 536                  | 0.0              | 0.0      |
|                                                            | colony 2                     | 0                | 0   | 1124                 | 0.0              | 0.0      |
|                                                            | <b>Average of colony 1-5</b> |                  |     |                      | 0.0±0.0          | 0.0±0.0  |

(b) Transformants carrying the *HSP104* expression plasmid, *p2HG-HSP104*, or the empty vector, *p2HG*, were resuspended in SC-histidine medium and grown overnight at 30°C before spreading on SC-Adenine, SC+raffinose+antimycin and YPD plates. After 3 days incubation, the number of colonies on SC-ade, raffinose, and YPD were counted. Ade<sup>+</sup> and Raf<sup>+</sup> indicate [PSI<sup>+</sup>] and [swi<sup>-</sup>], respectively.

**The effect of *HSP104* overexpression on [*SWI*<sup>+</sup>] - (c)**

|                                                                         | [ <i>PSI</i> <sup>+</sup> ] |                             |          | [ <i>psi</i> <sup>-</sup> ] |                             |          |
|-------------------------------------------------------------------------|-----------------------------|-----------------------------|----------|-----------------------------|-----------------------------|----------|
|                                                                         | [ <i>SWI</i> <sup>+</sup> ] | [ <i>swi</i> <sup>-</sup> ] | mixture* | [ <i>SWI</i> <sup>+</sup> ] | [ <i>swi</i> <sup>-</sup> ] | mixture* |
| [ <i>PSI</i> <sup>+</sup> ][ <i>SWI</i> <sup>+</sup> ], <i>HSP104</i> ↑ | 34                          | 0                           | 2        | 7                           | 8                           | 44       |
| vector                                                                  | 10                          | 0                           | 0        | 0                           | 0                           | 0        |
| [ <i>PSI</i> <sup>+</sup> ][ <i>swi</i> <sup>-</sup> ], <i>HSP104</i> ↑ | 0                           | 7                           | 0        | 0                           | 7                           | 0        |
| vector                                                                  | 0                           | 7                           | 0        | 0                           | 0                           | 0        |
| [ <i>psi</i> <sup>-</sup> ][ <i>SWI</i> <sup>+</sup> ], <i>HSP104</i> ↑ | 0                           | 0                           | 0        | 9                           | 0                           | 0        |
| vector                                                                  | 0                           | 0                           | 0        | 8                           | 0                           | 0        |
| [ <i>psi</i> <sup>-</sup> ][ <i>swi</i> <sup>-</sup> ], <i>HSP104</i> ↑ | 0                           | 0                           | 0        | 0                           | 8                           | 0        |
| vector                                                                  | 0                           | 0                           | 0        | 0                           | 8                           | 0        |

(c) Transformants carrying the *HSP104* expression plasmid, *p2HG-HSP104*, or the empty vector, *p2HG*, were streaked on YPD plates. Individual white ([*PSI*<sup>+</sup>]) or red ([*psi*<sup>-</sup>]) colonies were subsequently re-streaked on SC+raffinose+antimycin to check their [*SWI*<sup>+</sup>] status.

\*mixture denotes that both [*SWI*<sup>+</sup>] and [*swi*<sup>-</sup>] cells were obtained as mixed populations.

### Supplementary Table 3

Cytoduction efficiency of [SWI<sup>+</sup>]

| 74D-694 donor of                       | c10B-H49 cytoductants |                     |                         |
|----------------------------------------|-----------------------|---------------------|-------------------------|
|                                        | Total                 | [SWI <sup>+</sup> ] | [SWI <sup>+</sup> ] (%) |
| [PSI <sup>+</sup> ][SWI <sup>+</sup> ] | 35*                   | 31                  | 88.6                    |
| [psi <sup>-</sup> ][SWI <sup>+</sup> ] | 86                    | 42                  | 48.8                    |

This is a summary of 3 independent cytoduction experiments. \* Ten [PSI<sup>+</sup>] cytoductants were randomly picked and examined . Nine were confirmed as [PSI<sup>+</sup>], representing a [PSI<sup>+</sup>] cytoduction rate of 90%.

**Supplementary Figure 1**

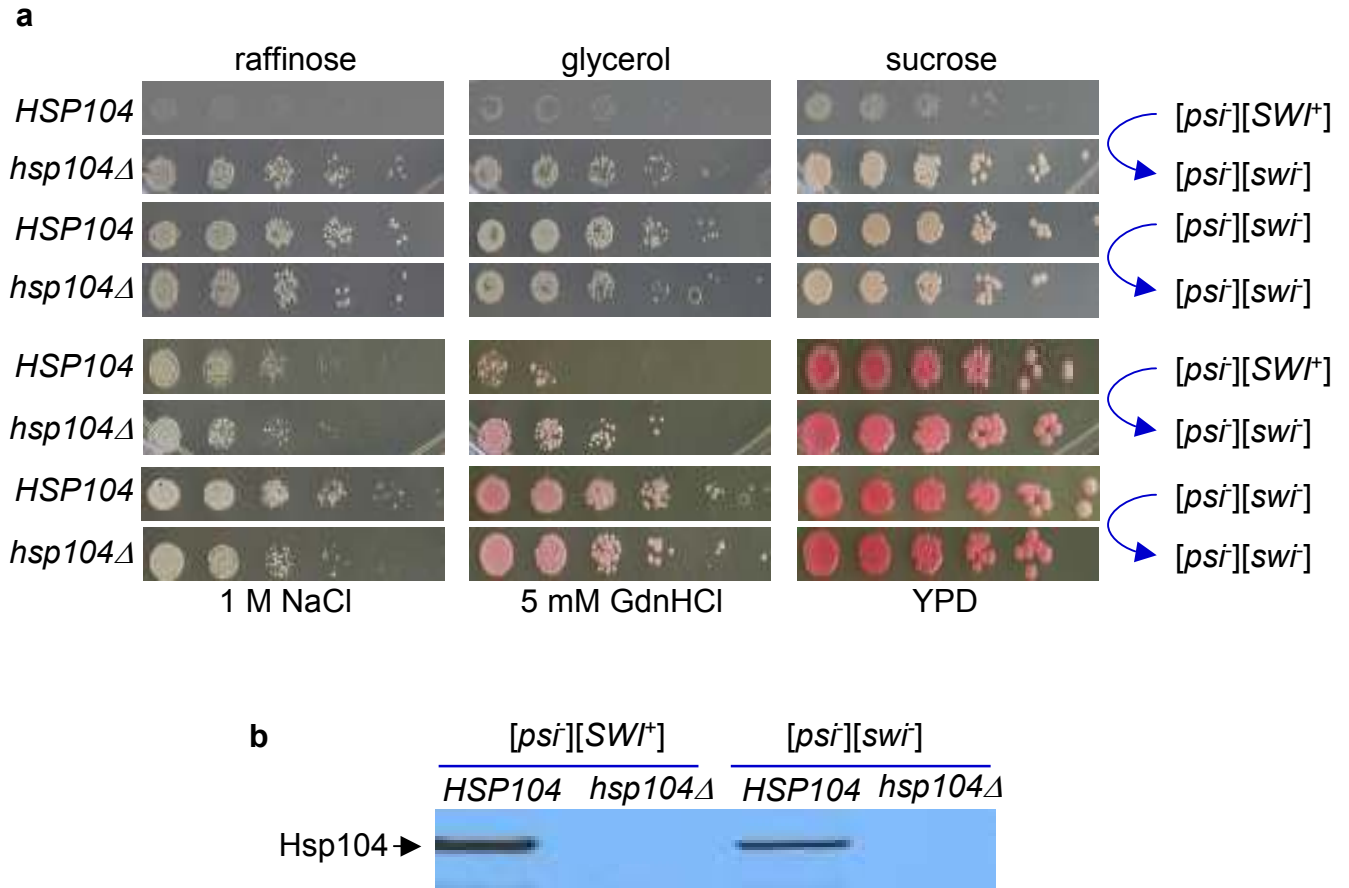

**Supplementary Figure 1** The effect of *HSP104* disruption on *[psi<sup>-</sup>][SWI<sup>+</sup>]*. **(a)** *[psi<sup>-</sup>][SWI<sup>+</sup>]* and *[psi<sup>-</sup>][swi<sup>-</sup>]* 74D-694, as well as their *HSP104* deletion derivatives were grown in YPD to mid-log phase and spotted to the indicated plates with a 5-fold serial dilution. **(b)** Immunoblot analysis to verify that *HSP104* was not expressed in the examined *HSP104* disruption strains.

## Supplementary Figure 2

**a**

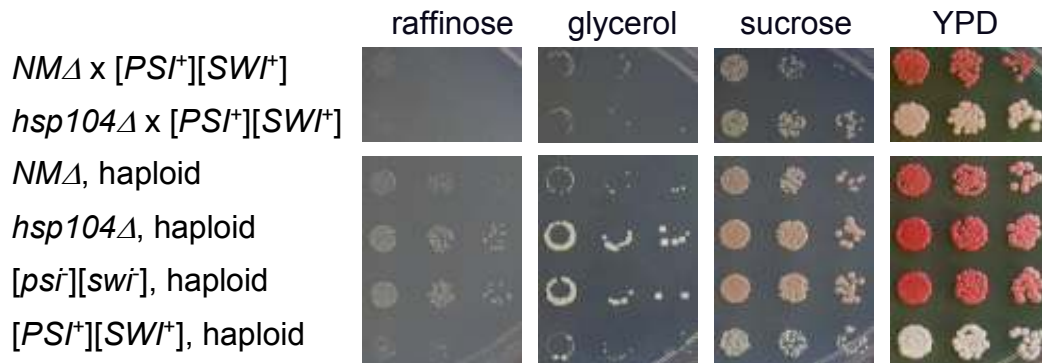

**b**

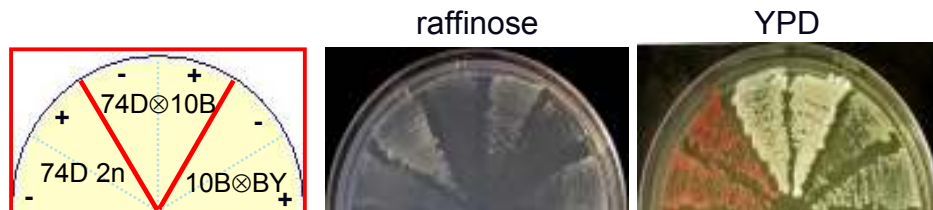

**Supplementary Figure 2** [*SWT*<sup>+</sup>] is dominantly inherited. **(a)** Phenotypic assay of [*SWT*<sup>+</sup>] diploids resulting from the crosses of **a** cells of 74D-694 ([*PSI*<sup>+</sup>][*SWT*<sup>+</sup>]) to **α** cells of isogenic strains of *NMΔ-SUP35* ([*psi*<sup>-</sup>][*swi*<sup>-</sup>]) or *hsp104::LEU2* ([*psi*<sup>-</sup>][*swi*<sup>-</sup>]). Cells were grown to mid-log phase and spotted to the indicated plates with a 5-fold serial dilution. Included are their corresponding haploid parents. Pictures were taken after 5 days incubation at 30°C. **(b)** [*SWT*<sup>+</sup>] diploids from various outcrosses displayed the GdnHCl-curable Raf<sup>-</sup> phenotype. Shown here are cell streaks of diploids from 74D-694-[*psi*<sup>-</sup>][*SWT*<sup>+</sup>] x 74D-694-[*psi*<sup>-</sup>][*swi*<sup>-</sup>] (74D 2n), 74D-694-[*PSI*<sup>+</sup>][*SWT*<sup>+</sup>] x c10B-H49 (74D⊗10B), and c10B-H49 [*psi*<sup>-</sup>][*SWT*<sup>+</sup>] x S288C (10B⊗BY) on the indicated media. - and + represent with or without 5 mM GdnHCl treatment.

### Supplementary Figure 3

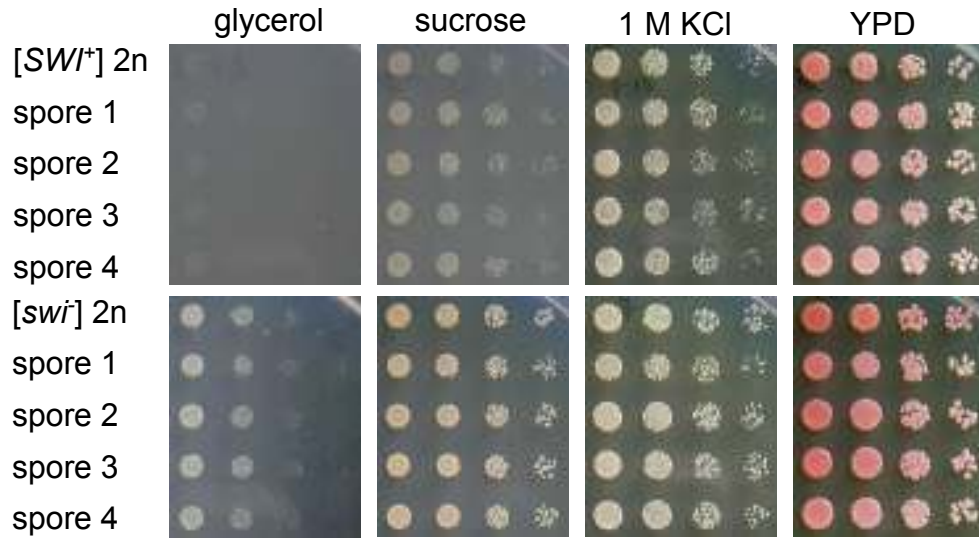

**Supplementary Figure 3** Phenotypic assays of 74D-694 [*psi*][*SWI*<sup>+</sup>] diploids and their meiotic progenies. Shown here are representative sets of spores generated from 74D-694 [*psi*][*SWI*<sup>+</sup>] cells (2n) spotted on the indicated plates. Phenotypes on raffinose are shown in **Figure 4b**.



**Supplementary Figure 4**

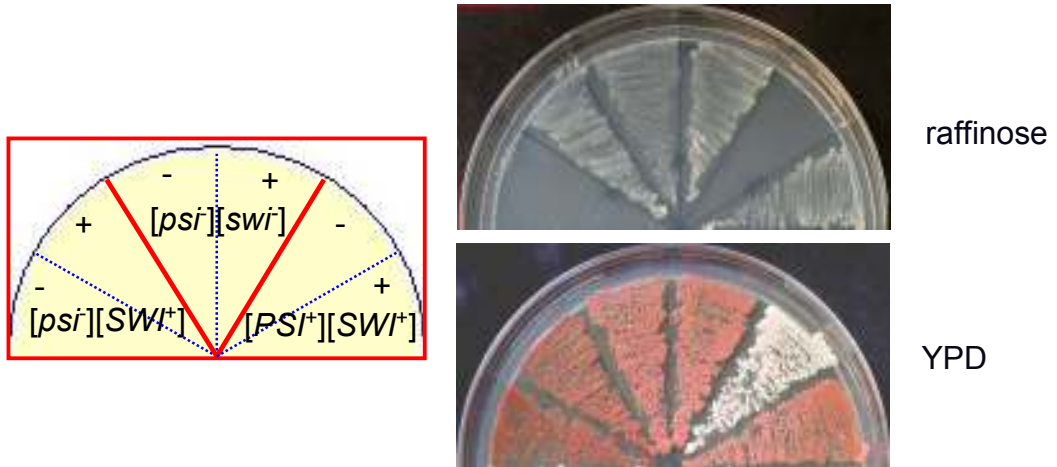

**Supplementary Figure 4** [*SWI*<sup>+</sup>] cytoductants of c10B-H49 exhibit the GdnHCl-curable Raf phenotype. Shown here are streaks of c10B-H49 cells with indicated prion backgrounds, prior to (-) and after (+) 5 mM GdnHCl treatment.

**Supplementary Figure 5**

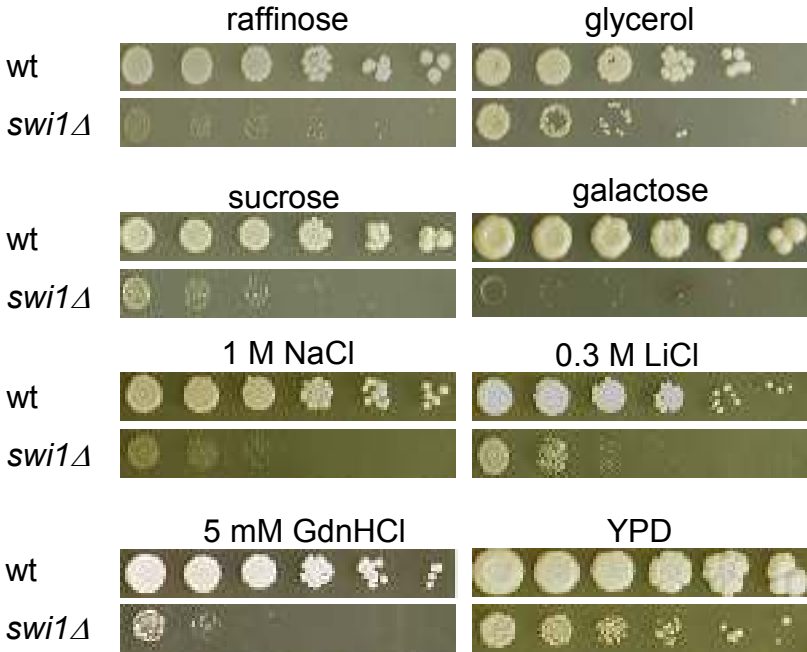

**Supplementary Figure 5** Selective phenotypes of a *swi1* null mutant in S288C. Wild-type (wt) and *SWI1* deletion (*swi1Δ*) yeast cells were grown in YPD to mid-log phase and spotted onto indicated plates. Shown here are 5-fold serial dilutions from a starting density of  $10^6$  cells/ml. Pictures were taken after 5-day incubation in 30°C.

## Supplementary Figure 6

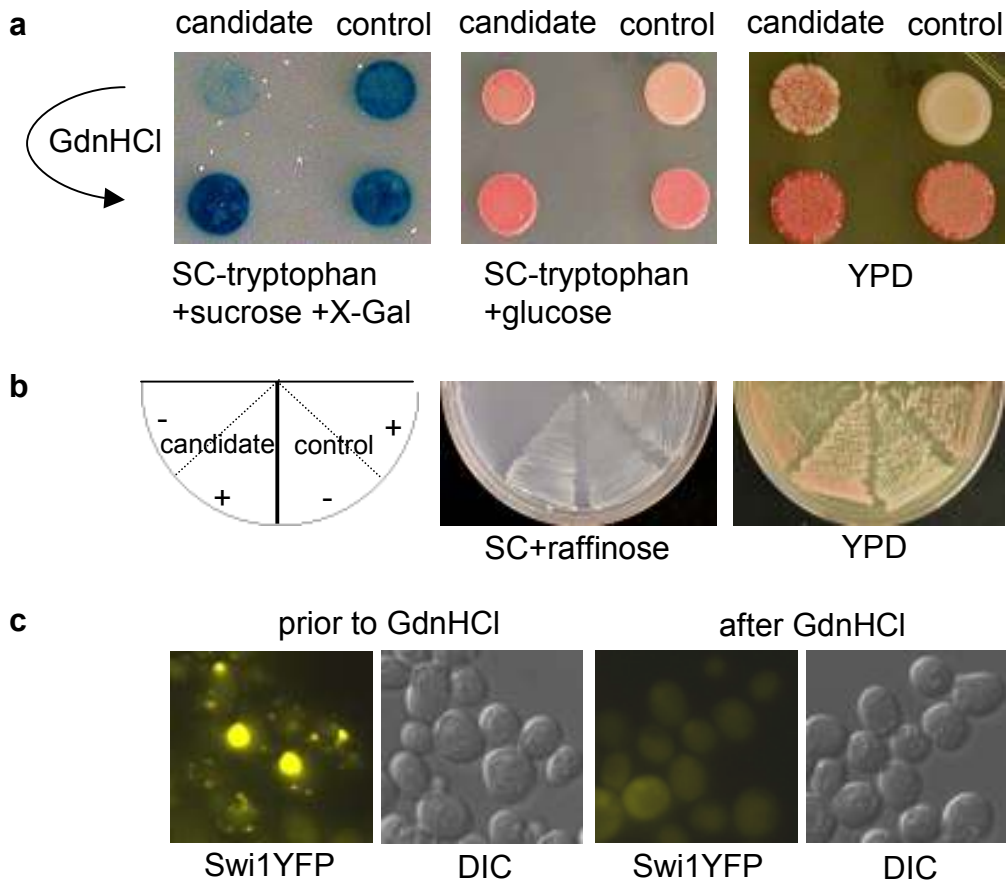

**Supplementary Figure 6** Swi1 is able to undergo inheritable changes in conformation without Swi1 overproduction. 74D-694 [*PSI*<sup>+</sup>] [*PIN*<sup>+</sup>][*swi*<sup>-</sup>] cells were transformed with *pLS7*, a *cen*-plasmid carrying a *lacZ* reporter gene whose expression requires functional SWI/SNF complex. Forty-eight randomly picked transformants were streaked onto -tryptophan selective plates with or without 5 mM GdnHCl followed by replica-plating to -tryptophan+sucrose +X-Gal plate to check the reporter activity. Two transformants showed significant color changes upon GdnHCl treatment, from light blue to deep blue. Upon re-streaking, 8 colonies with strong color changes were subsequently picked from the population of the two transformants and re-checked for their GdnHCl-affected reporter activities. Three isolates that retained [*SWI*<sup>+</sup>]-like color changes on X-Gal plates were picked for further studies. Shown here are representative data collected from one of the three isolates: GdnHCl dependent changes in *pLS7* reporter activity (**a**), Raf phenotype (**b**), and Swi1YFP aggregation (**c**). Candidate: [*SWI*<sup>+</sup>] candidate; control: parental cells of 74D-694 [*PSI*<sup>+</sup>] [*PIN*<sup>+</sup>][*swi*<sup>-</sup>]; -: without GdnHCl treatment. +: after GdnHCl treatment. Please note, [*PSI*<sup>+</sup>] became unstable in the [*SWI*<sup>+</sup>] candidates, displaying a mixed population of [*PSI*<sup>+</sup>] and [*psi*<sup>-</sup>] cells. Please also note, we attempted several similar experiments without success before this experiment. Therefore, the rate of [*SWI*<sup>+</sup>] occurrence remains to be determined.
